# Supplementary material for: Paraquat quantification in deposits from drinking water networks
Source: Royal Society of Chemistry journal article supplement (doi:10.1039/c4ay00121d), 2014-01-01
Supplement: c4ay00121d1.pdf [file c4ay00121d1.pdf]

## Supporting Information

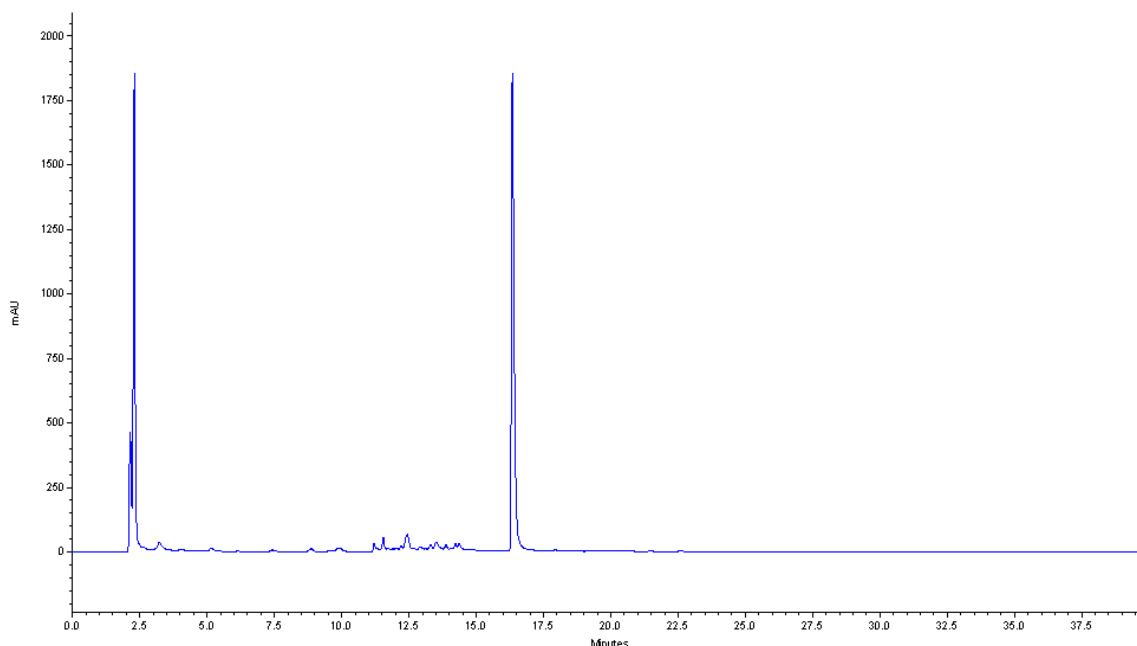

Figure S1. Example of a chromatogram for PQ-S3 system ( $80 \mu\text{gPQ/gS3}$ ).

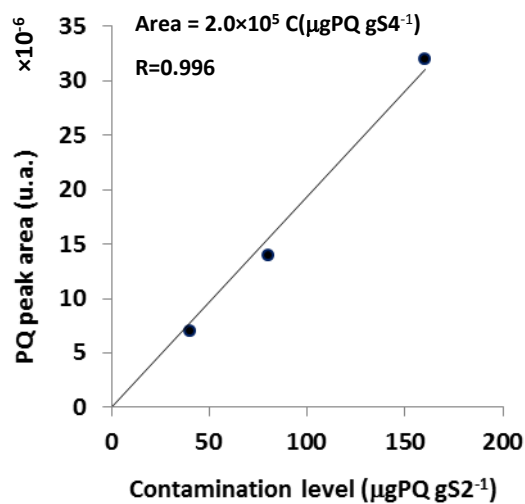

Figure S2. Linear relationship obtained for PQ-S2 system by HPLC-DAD.

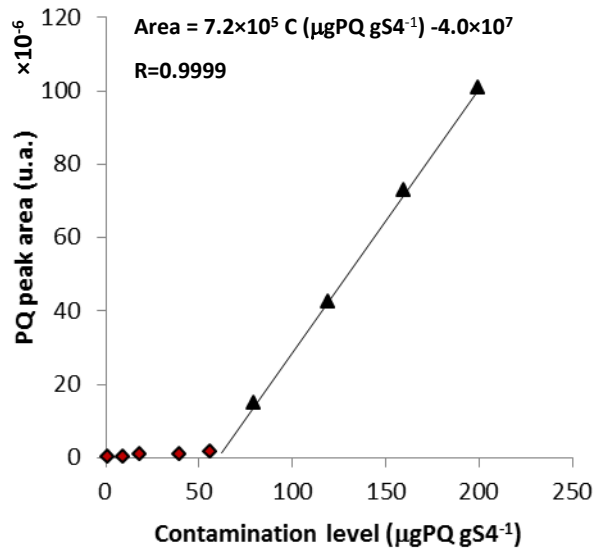

Figure S3. Linear relationship obtained for PQ-S4 system by HPLC-DAD (results out of linearity are signaled with different symbols)

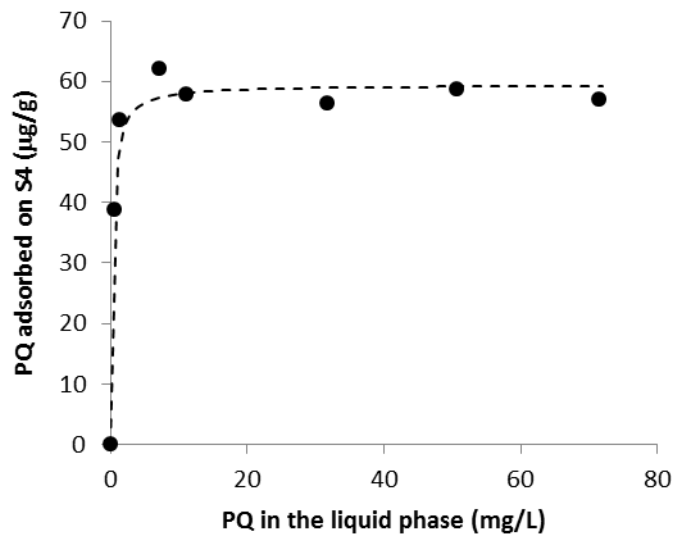

Figure S4. Adsorption isotherm for PQ-S4 system.
